# Supplementary material for: Costs of multimorbidity: a systematic review and meta-analyses
Source: BMC Med. 2022 Jul 19;20:234. doi: 10.1186/s12916-022-02427-9 (PMC9295506; doi:10.1186/s12916-022-02427-9)
Supplement: Supplementary file 8 — Additional file 8. Checklist and data used for the country comparison [file 12916_2022_2427_MOESM8_ESM.xlsx]

## Sheet: Data
US_studies	Country	GDP	Study	Cost	Dyad	Study design	Data source	All-cause cost
Yes	United States	65297.5	PT31	43320	Cancer + MH	CR	Claims	Doesn't say
Yes	United States	65297.5	PT31	45600	Cancer + MH	CR	Claims	Doesn't say
No	Canada	46326.7	PT59	4860	Cancer + MH	CR	Linked data	Doesn't say
Yes	United States	65297.5	PT03	36390	DM + Heart/Vascular	LO	Claims	Yes
Yes	United States	65297.5	PT03	55696	DM + Heart/Vascular	LO	Claims	Yes
Yes	United States	65297.5	PT42	37061	DM + Heart/Vascular	LO	Linked data	Yes
Yes	United States	65297.5	PT60	20431	DM + Heart/Vascular	LO	Claims	Yes
No	Italy	33566.8	PT69	9448	DM + Heart/Vascular	LO	Claims	Doesn't say
Yes	United States	65297.5	PT33	15283	DM + HYPT	CR	Survey	Doesn't say
Yes	United States	65297.5	PT43	8574	DM + HYPT	CR	Survey	Doesn't say
No	South Korea	31846.2	PT45	8234	DM + HYPT	CR	Claims	No
Yes	United States	65297.5	PT51	15459	DM + HYPT	CR	Survey	Doesn't say
No	Spain	29564.7	PT57	2714	DM + HYPT	LO	EMR	No
Yes	United States	65297.5	PT61	15943	DM + HYPT	CR	Survey	Doesn't say
Yes	United States	65297.5	PT19	20128	DM + MH	CR	Survey	Doesn't say
Yes	United States	65297.5	PT21	22920	DM + MH	CR	Survey	Doesn't say
Yes	United States	65297.5	PT21	18393	DM + MH	CR	Survey	Doesn't say
No	Taiwan	25873	PT30	8045	DM + MH	LO	Claims	Doesn't say
No	Canada	46326.7	PT59	4347.5	DM + MH	CR	Survey	Doesn't say
Yes	United States	65297.5	PT33	25274	HYPT + CKD	CR	Survey	Doesn't say
No	South Korea	31846.2	PT45	13440	HYPT + CKD	CR	Claims	No
Yes	United States	65297.5	PT51	16308	HYPT + CKD	CR	Survey	Doesn't say
Yes	United States	65297.5	PT33	28082	HYPT + Other Heart/Vascular	CR	Survey	Doesn't say
Yes	United States	65297.5	PT33	19797	HYPT + Other Heart/Vascular	CR	Survey	Doesn't say
Yes	United States	65297.5	PT43	13305	HYPT + Other Heart/Vascular	CR	Survey	Doesn't say
No	South Korea	31846.2	PT45	9187	HYPT + Other Heart/Vascular	CR	Claims	No
No	South Korea	31846.2	PT45	10371	HYPT + Other Heart/Vascular	CR	Claims	No
Yes	United States	65297.5	PT51	19530	HYPT + Other Heart/Vascular	CR	Survey	Doesn't say
Yes	United States	65297.5	PT51	17013	HYPT + Other Heart/Vascular	CR	Survey	Doesn't say
Yes	United States	65297.5	PT51	16285	HYPT + Other Heart/Vascular	CR	Survey	Doesn't say
Yes	United States	65297.5	PT51	16735	HYPT + Other Heart/Vascular	CR	Survey	Doesn't say
Yes	United States	65297.5	PT04	12946	MH + Heart/Vascular	CR	Survey	Doesn't say
Yes	United States	65297.5	PT04	9507	MH + Heart/Vascular	CR	Survey	Doesn't say
No	Canada	46326.7	PT59	4346	MH + Heart/Vascular	CR	Linked data	Doesn't say
Yes	United States	65297.5	PT13	34021	Respiratory + Heart/Vascular	LO	Claims	Yes
No	Spain	29564.7	PT16	6479	Respiratory + Heart/Vascular	CR	Linked data	Doesn't say
Yes	United States	65297.5	PT40	37454	Respiratory + Heart/Vascular	LO	Claims	Yes
No	Germany	46467.5	PT54	11270	Respiratory + Heart/Vascular	CR	Claims	Yes
Yes	United States	65297.5	PT14	36449	Respiratory + MH	LO	Claims	Yes
Yes	United States	65297.5	PT40	37369	Respiratory + MH	LO	Claims	Yes
No	Canada	46326.7	PT59	6134	Respiratory + MH	CR	Linked data	Doesn't say

## Sheet: LMM
	Mixed model
	Predictor	Estimate	Standard error
	Intercept	-4.71**	1.29
	GDP	1.87***	0.28
	Random effects	Variance
	Study	0.022
	Data source	0.029
	Residual	0.007
	AIC	-30.59
	R-squared adjusted	0.94
	N	41
	**p < 0.01, *** p < 0.001
	Fixed effects model

## Sheet: Checklist
Study	Dyad	Cost perspective	Study design	Data source	Ingredients	All-cause costs	Level of care	Reported unit	Self-handling	Comments
PT03	DM + Heart/Vascular	Public	LO	Claims	Medical(IP,OP,ED) + pharmacy	x	All	PPPM	*12
PT04	MH + Heart/Vascular	Public (plan & patient paid & others)	CR	MEPS survey	Medical(IP,OP,ED) + pharmacy + …	Doesn't say	All	PPPY
PT13	Respiratory + Heart/Vascular	Public (plan & patient paid)	LO	Claims	Medical(IP,OP,ED) + pharmacy + …	x	All	PPPY
PT14	Respiratory + MH	Public (plan & patient paid)	LO	Claims	Medical(IP,OP,ED) + pharmacy + …	x	All	PPPY
PT16	Respiratory + Heart/Vascular	Societal	CR	Project (PS, EMR)	Medical(IP,OP,ED) + pharmacy + LOP + …	Doesn't say	Primary care	PPPY	Removed indirect cost (38.33) from reported total cost	LoP
PT19	DM + MH	Public (plan & patient paid & others)	CR	pooled MEPS survey	Medical(IP,OP,ED) + pharmacy + …	Doesn't say	All	PPPY
PT21	DM + MH	Public (plan & patient paid & others)	CR	pooled MEPS survey	Medical(IP,OP,ED) + pharmacy + …	Doesn't say	All	PPPY
PT30	DM + MH	Public (ffs)	LO	Claims	Medical(IP,OP,ED) + pharmacy + …	Doesn't say	All	PPPY		2004 only
PT31	Cancer + MH	Public	CR	Claims	Medical(IP,OP,ED) + pharmacy + …	Doesn't say	All	PPPY		No SD/range
PT33	DM + HYPT	Public (plan & patient paid & others)	CR	MEPS survey	Medical(IP,OP,ED) + pharmacy + …	Doesn't say	All	PPPY		No sample size
PT40	Respiratory + Heart/Vascular	Public (plan & patient paid)	LO	Claims	Medical(IP,OP,ED) + pharmacy + …	x	All	PPPY
PT42	DM + Heart/Vascular	Public (plan & patient paid)	LO	EMR+claims	Medical(IP,OP,ED) + pharmacy + lab tests + …	x	Primary care	PPPM	*12	Lab tests and others included in OP
PT43	DM + HYPT	Public (plan & patient paid & others)	CR	MEPS survey	Medical(IP,OP,ED) + pharmacy + …	Doesn't say	All	PPPY
PT45	DM + HYPT	Public (plan paid only)	CR	Claims	Medical(IP,OP) + pharmacy + …	-	All	PPPY
PT51	HYPT + Other Heart/Vascular	Public (plan & patient paid & others)	CR	MEPS survey	Medical(IP,OP,ED) + pharmacy + …	Doesn't say	All	PPPY
PT54	Respiratory + Heart/Vascular	Public	CR	Claims	Medical(IP,OP,ED) + pharmacy + …	x	All	PPPY
PT57	DM + HYPT	Societal	LO	EMR	Medical(IP,OP,ED) + pharmacy + LoP	-	All	PP 2-year costs	Removed indirect cost (994) from total cost and divided by 2	LoP, 2-year costs
PT59	Cancer + MH	Public (plan & patient paid)	CR	Survey+claims	Medical(IP,OP,ED) + pharmacy + …	Doesn't say	All	PP 2-year costs	/2
PT60	DM + Heart/Vascular	Public (plan & patient paid)	LO	Claims	Medical(IP,OP,ED) + pharmacy	x	All	PPPY	Averaged all periods (9 years)
PT61	DM + HYPT	Public (plan & patient paid & others)	CR	MEPS survey	Medical(IP,OP,ED) + pharmacy + …	Doesn't say	All	PPPY
PT69	DM + Heart/Vascular	Public	LO	Claims	Medical(IP,OP,ED) + pharmacy + specialist	Doesn't say	All	PPPY
																			0
